1 **Research Article**

2 **Title:** Treatment with an Anti-CK2 Synthetic Peptide Improves Clinical Response in  
3 Covid-19 Patients with Pneumonia. A Randomized and Controlled Clinical Trial

4 **Authors:** Leticia R. Cruz<sup>1\*</sup>, Idania Baladrón<sup>2\*</sup>, Aliusha Rittoles<sup>1</sup>, Pablo A. Díaz<sup>2</sup>, Carmen  
5 Valenzuela<sup>3</sup>, Raúl Santana<sup>1</sup>, Maria M. Vázquez<sup>2</sup>, Ariadna García<sup>1</sup>, Deyli Chacón<sup>1</sup>, Delvin  
6 Thompson<sup>1</sup>, Gustavo Perera<sup>1</sup>, Ariel González<sup>4</sup>, Rafael Reyes<sup>5</sup>, Loida Torres<sup>4</sup>, Jesus  
7 Pérez<sup>1</sup>, Dania M. Vázquez<sup>2</sup>, Gilda Lemus<sup>2</sup>, Mauro Rosales<sup>2,6</sup>, Ailyn C. Ramón<sup>2</sup>, George  
8 V. Perez<sup>2</sup>, Gerardo Guillén<sup>2</sup>, Verena Muzio<sup>2</sup>, Yasser Perera<sup>2,7</sup>, and Silvio E. Perea<sup>2</sup> for the  
9 ATENEA-Co-300 group♣

10 \* These authors contributed equally to this work

11 **Affiliations:**

- 12 1. Central Hospital “Luis Diaz Soto”, Havana 19130, Cuba
- 13 2. Center for Genetic Engineering and Biotechnology, Havana 10600, Cuba
- 14 3. Center for Molecular Immunology, Havana 11600, Cuba
- 15 4. International Center of Health “La Pradera”, Havana 11600, Cuba
- 16 5. National Institute of Oncology and Radiobiology, Havana 10400, Cuba
- 17 6. Faculty of Biology, University of Havana, Havana 10400, Cuba
- 18 7. China-Cuba Biotechnology Joint Innovation Center (CCBJIC), Yongzhou Zhong Gu  
19 Biotechnology Co., Ltd, Yangjiaqiao Street, Lengshuitan District, Yongzhou City, Hunan  
20 425000, China

21 **Corresponding Author:**

22 Silvio E. Perea, PhD, Prof ([silvio.perea@cigb.edu.cu](mailto:silvio.perea@cigb.edu.cu))  
23 Head of the Molecular Oncology Group  
24 Biomedical Research Area  
25 Center for Genetic Engineering and Biotechnology  
26 Havana 10600, Cuba

27 **Number of Figures:** 2

28 **Number of Tables:** 5

29 **Keywords:** Covid-19, Coronavirus infection, SARS-Cov2, Protein Kinase CK2, CIGB-325

30 **Abstract**

31 **Background:** The recently discovered instrumental role of CK2 in the SARS-Cov2  
32 infection has pointed out this protein kinase as a promising therapeutic target in Covid-19  
33 disease. Accordingly, anti-SARS-Cov2 activity has been reported by CK2 inhibitors *in*  
34 *vitro*, however any anti-CK2 clinical approach has been assessed in Covid-19 patients so  
35 far. Here, we investigated the putative clinical benefit of CIGB-325, an anti-CK2 peptide  
36 previously used in cancer patients, which was added to the standard-of-care to treat  
37 Covid-19.

38 **Methods:** A monocentric, randomized standard-of-care controlled trial of intravenous  
39 CIGB-325 in adults hospitalized with Covid-19. Twenty patients were randomly assigned  
40 to receive CIGB-300 (2.5 mg/kg/day during 5-consecutive days) plus standard-of-care  
41 (10 patients) or standard-of-care (10 patients). Primary outcomes were time to viral  
42 clearance defined as the time (in days) to have nasopharyngeal SARS-Cov2 negative  
43 PCR and clinical response. This trial is registered with  
44 <https://rpcec.sld.cu/trials/RPCEC00000317-En> (Code: IG/CIGB300I/CV/2001).

45 **Results:** Most of the patients had initial positive by chest-computed tomography (CT).  
46 CIGB-325 treatment reduced both number of pulmonary lesions and lesion's extent  
47 compared to control group in seven days. Taking into account the Covid-19 chest-CT  
48 abnormalities, CIGB-325 was also superior to control as well as in terms of proportion of  
49 patients with such clinical benefit. Improvement of clinical status was experienced in  
50 50% of patients in the CIGB-325 group and 25% in control. Accordingly, systemic levels  
51 of CPK, LDH and CRP were lowered at day 7 by treating with this anti-CK2 peptide.  
52 Both therapeutic regimens were similar respect to SARS-Cov2 clearance in nasopharynx  
53 swabs over the time.

54 **Conclusion:** Our study revealed that consecutive-5 day regimen of intravenous CIGB-  
55 325 at 2.5 mg/kg quickly improved the chest-CT outcomes over standard-of-care. This is  
56 the first report describing signs of clinical benefit of an anti-CK2 approach in Covid-19.

## 57 **Introduction**

58 Severe acute respiratory syndrome coronavirus 2 (SARS-CoV-2) has spread worldwide  
59 and has infected nearly 20 million people [1, 2]. Many infected people are asymptomatic  
60 or experience mild symptoms and recover without medical intervention [3, 4]. However,  
61 older people and those with comorbid hypertension, diabetes, obesity, and heart disease  
62 are at higher risk of life-threatening illness [5, 6]. Therefore, development of an effective  
63 antiviral drug for COVID-19 is a global health priority. Along with the development of  
64 new antiviral drugs, repurposing existing drugs for COVID-19 treatment is also  
65 accelerated [7]. Some antiviral drugs have shown high efficacy against SARS-CoV-2  
66 both *in vitro* [8] and *in vivo* models [9, 10]. A number of clinical studies such as  
67 compassionate use programs and clinical trials have been conducted to test the efficacy of  
68 FDA-approved drugs, such as lopinavir and ritonavir, chloroquine, favipiravir, and  
69 remdesivir (RDV) [11-14]. However, the results from those clinical studies were often  
70 inconsistent and lacking of compelling evidences. More recently, a double-blind,  
71 randomized, placebo-controlled trial of intravenous RDV in adults hospitalized with  
72 Covid-19 and lower respiratory tract involvement had a median recovery time of 11 days  
73 (95% confidence interval [CI], 9 to 12), as compared with 15 days (95% CI, 13 to 19) in  
74 those who received placebo (rate ratio for recovery, 1.32; 95% CI, 1.12 to 1.55; P <  
75 0.001) [15].

76 At present, the main antiviral strategies currently employed against SARS-CoV-2 can  
77 broadly be divided into two types: strategies directly targeting the virus and strategies  
78 indirectly targeting the virus via host modulation [16]. In both strategies there are  
79 already-approved drugs and experimental candidates in Clinical trials [16]. Likewise,  
80 discovery of novel cellular targets for SARS-Cov2 coronavirus has led to novel putative  
81 clinical strategies which merit going into clinical research in Covid-19.

82 CK2 is a constitutively active Ser/Thr protein kinase deregulated in cancer and other  
83 pathologies, responsible for about the 20% of the human phosphoproteome [17, 18].  
84 Considering, both experimental and clinical validation data, CK2 has been regarded as an  
85 emerging oncology target [19, 20]. In infectious diseases, CK2 phosphorylates and  
86 modulates the function of viral proteins from Hepatitis C Virus (HCV) [21], Vesicular  
87 stomatitis virus (VSV) [22], Human Immunodeficiency Virus (HIV) [23], Human

88 Papilloma Virus (HPV) [24], and Herpes simplex-1 (HSV-1) [25]. Furthermore, CK2  
89 also regulates a number of signaling cascades such as NF- $\kappa$ B [26], JAK / STAT [27], and  
90 PTEN / PI3K / Akt-PKB [28], that viruses hijacked to guaranteed their propagation.  
91 Therefore, it is expected that pharmacological intervention of CK2 may impact on viral  
92 replication. Recently, CK2 has been found to be directly targeted by the SARS-Cov2  
93 nucleocapsid protein and they both co-localize along the filopodia protrusions that  
94 promote virus egress and rapid cell-to-cell spread across epithelial mono-layers of  
95 infected cells [29]. Additionally, inhibition of CK2 in those experiments demonstrated  
96 the instrumental role of this protein kinase for SARS-Cov2 infection *in vitro* [29].  
97 Considering the scientific rationality of inhibiting CK2 in SARS-Cov2 infection and  
98 taking advance of CIGB-325 (formerly CIGB-300) as an anti-CK2 synthetic peptide  
99 previously already assessed in different Phase I-II in cancer patients, we investigated the  
100 putative clinical benefit of this peptide in Covid-19 patients. Particularly, safety and  
101 tolerability of intravenous delivery of CIGB-325 has been previously assessed from 0.2  
102 to 12.8 mg/kg [30, 31] as well as the consecutive-5 day regimen of administration.  
103 In this clinical study we administered intravenous CIGB-325 at 2.5 mg/kg along with  
104 standard-of-care for treating SARS-Cov2 positive patients in Cuba which is based on  
105 alpha 2b-IFN plus kaletra/hydroxyquinoline. Preliminary data indicated that combination  
106 of CIGB-325 with standard-of-care improved chest-CT outcomes in Covid-19 patients  
107 with pneumonia at day 7. Other signs of clinical benefit for this therapeutic regimen were  
108 also registered in our study. This is the first clinical study where an anti-CK2 approach is  
109 investigated in Covid-19 disease.

## 110 **Methods**

### 111 **Patients**

112 Twenty patients confirmed as SARS-CoV-2 positive by real-time transcriptase  
113 polymerase chain reaction (RT-PCR) were enrolled in an open, monocentric, randomized  
114 standard-of-care controlled trial at the “Luis Diaz Soto” Hospital in Havana, Cuba  
115 (<https://rpcec.sld.cu/trials/RPCEC00000317-En> (Code: IG/CIGB300I/CV/2001)  
116 (ATENEA-Co-300 trial). CIGB-300 code was substituted by CIGB-325 just after online  
117 clinical trial registration; therefore, it appears with the former code. The Ethics  
118 Committee for Clinical Research in the hospital and Cuban Regulatory Agency  
119 (CECMED) approved the trial. The study complied with the Good Clinical Practices and  
120 the precepts established in the Declaration of the Helsinki World Medical Association.  
121 All patients met the inclusion criteria described in the protocol and signed the informed  
122 consent.

### 123 **Laboratory examination**

124 Laboratory results included blood routine, leucocyte subsets and blood biochemical  
125 parameters. Serum levels of CPK, LDH and RCP were determined by a specific Roche  
126 system (Roche-cobas-C311).

### 127 **SARS-Cov2 viral dynamic in nasopharyngeal swabs**

128 Nasopharyngeal swabs were obtained from patients at days 0, 3, 7, and 14. Viral RNA  
129 was detected by RT-PCR amplification by using specific SARS-Cov2 primers. Presence  
130 of SARS-Cov2 in swabs was followed-up at indicated times and compared among both  
131 groups.

### 132 **Clinical response**

133 Clinical status was classified as asymptomatic, mild, moderate and severe Covid-19  
134 disease according to the NIH guide “Coronavirus Disease 2019 (COVID-19) Treatment  
135 guidelines”. <https://www.covid19treatmentguidelines.nih.gov>. The chest-CT analysis was  
136 performed considering number of pulmonary lesions, lesion’s extent and common Covid-  
137 19 typical abnormalities like consolidation, glass-round opacity and mix pattern.

### 138 **Safety**

139 Pretreatment evaluation included a detailed history and physical examination. In addition,  
140 hematological counts, blood chemistry, coagulation, radiography and chest-CT studies

141 were performed. Systemic toxicity was evaluated daily after each CIGB-325  
142 administration. Severity of adverse events was classified by the WHO Adverse Reaction  
143 Terminology [32]. Causal relationship was classified as very probable (definitive),  
144 probable, possible or remote (doubtful) [33].

#### 145 **Statistical Analysis**

146 For chest-CT variables, the analysis was performed in Per Protocol population defined as  
147 patients who completed the originally allocated and patients that have TAC at the  
148 beginning and at the end of treatment. Continuous variables were expressed as mean and  
149 standard deviations or median and interquartile ranges (depending of the assumption of  
150 normal distribution). Student-t test or Mann-Whitney U test were applied to continuous  
151 variables, and chi-square or Fisher's exact test were used for categorical variables. For  
152 the variation in time in each group, Wilcoxon-rank test or Student-t test for dependent  
153 variables were used. Type 1 error of 0.05 was specified. Considering the small sample  
154 size, the difference between groups (for clinical and chest-CT evaluations, proportion of  
155 patients with reduction of score and number of lesions) was estimated from the Bayesian  
156 point of view, performing 10,000 simulations and specifying non-informative prior  
157 distributions. The analysis was performed using SPSS 25.0 software and EPIDAT 3.1.

## 158 **Results**

### 159 **Baseline characteristics of Covid-19 patients**

160 Between June 1, 2020, and June 16, 2020, twenty SARS-Cov2 positive patients  
161 underwent randomization in the hospital “Luis Diaz Soto” in Havana, Cuba. Ten were  
162 assigned to receive intravenous CIGB-325 + standard-*of-care* (Group I) and 10 to receive  
163 standard-*of-care* as control (Group II). To diminish the chance of disease progression, the  
164 Cuban Program for managing Covid-19 patients is based on the application of standard-  
165 *of-care* immediately upon confirmation of nasopharyngeal SARS-Cov2 diagnosis  
166 irrespectively of having symptoms or not. The median number of days between SARS-  
167 Cov2 diagnosis, hospitalization and treatment initiation was 2 days. All the patients  
168 completed the treatment as planned except one patient from Group I who experienced  
169 some concomitant moderate histaminergic adverse events during the first CIGB-325  
170 intravenous delivery and dose was decreased to 1.6 mg/kg for remaining days as  
171 indicated in the clinical protocol.

172 The mean age of patients was 45.35 years and 70% were male (Table 1). Fourteen  
173 patients (70%) were asymptomatic at the enrollment and 9 (45%) at the starting day of  
174 treatment. Fifty percent of patients (5/10) had moderate disease and 20% (2/10) were  
175 severe in the CIGB-325 group while 40% of patients (4/10) had moderate disease and  
176 none severe case at the starting day of treatment (Table 1).

177 Overall, 25% of patients had hypertension, 25% had obesity and none had type 2  
178 diabetes. Other comorbidities were anemia (1/20), glaucoma (1/20), hypothyroidism  
179 (1/20), cancer (1/20). The most substantial imbalance in baseline characteristics was  
180 observed between the CIGB-325 group and control respect to age and coexisting high  
181 risk conditions which were more unfavorable in the CIGB-325 group (Table 1).

182 Data from baseline chest-CT analysis showed that 80% of patients in the CIGB-325  
183 group had positive chest-CT according to presence of ground-glass opacity,  
184 consolidation, mixed pattern and affectation of more than three pulmonary lobules. In the  
185 control group, 50% of patients had positive chest-CT with presence of consolidation,  
186 mixed pattern and affectation of less than two pulmonary lobules.

187 Concerning hematological and biochemical baseline parameters in all patients, abnormal  
188 levels were observed in hemoglobin (25%), platelets (15%), neutrophils (50%),

189 lymphocytes (40%), aspartate aminotransferase (ASAT) (20%), alanine aminotransferase  
190 (ALAT)(40%), ferritin (35%), creatinine (20%), and glycemia (30%). Other parameters  
191 were in the normal range.

### 192 **Primary and exploratory efficacy end points**

193 The dynamic conversion from positive to negative of SARS-Cov2 RT-PCR results was  
194 analyzed in both groups of treatments at 0, 3, 7, and 14 days. No significant differences  
195 were observed in the median time, 11 days  $\pm$  8.0 for CIGB-325 plus standard care and 12  
196 days  $\pm$  6 for standard care alone ( $p = 0.614$ ). Thus, time to SARS-Cov2 viral clearance in  
197 the nasopharynx swabs behaved similarly for both treatments over the time.

198 The clinical status was classified in categories of asymptomatic, mild, moderate or severe  
199 disease and it was followed up until ending treatment and thereafter for both groups. In  
200 the intent-*to-treat* population of CIGB-325 group at day 6 there were 2/10 patients that  
201 remained asymptomatic since initiation of treatment, 2/10 changed from severe to  
202 moderate, 1/10 from moderate to asymptomatic, 1/10 from mild to asymptomatic and  
203 4/10 did not change their clinical status during the treatment. Otherwise, in the control  
204 6/10 patients remained asymptomatic since initiation of treatment, 1/10 changed from  
205 mild to asymptomatic and 3/10 did not change their clinical status during the treatment.

206 Additionally, chest-CT analysis was performed to investigate the effect of CIGB-325  
207 over the Covid-19 pulmonary lesions. For that purpose, both number and lesion's extent  
208 at day 0 and after treatment (day 7) were compared just in those patients analyzed per  
209 protocol (Table 2). Importantly, CIGB-325 treatment significantly reduced the median  
210 number of pulmonary lesions from  $9.5 \pm 10$  (day 0) to  $5.5 \pm 10$  (day 7) ( $p = 0.042$ ).  
211 Conversely, no substantial change was observed in the control group. Proportion of  
212 patients with reduction of pulmonary lesions was higher in the CIGB-325 group  
213 compared with control according to the Bayesian analysis ( $pDif > 0; 0.951$ ) (Table 2).

214 The effect over lesion's extent showed in Table 3 including those patients analyzed per  
215 protocol indicates that CIGB-325 treatment also reduced the median of lesion's extent  
216 after consecutive-5 day regimen although not significantly. Otherwise, any kind of  
217 reduction was observed in the control group. Importantly, proportion of patients with  
218 reduction of lesion's extent was higher in the CIGB-325 group (4/7) compared with  
219 control (1/9) ( $pDif > 0; 0.982$ ) (Bayesian analysis).



220 The overall chest-CT response was also analyzed considering the number of lesions,  
221 lesion's extent and the pattern of Covid-19 typical chest-CT abnormalities (Table 4). The  
222 analysis per protocol showed that 50% (3/6) of patients in the CIGB-325 group had a  
223 favorable overall chest-CT response compared with 28.6% (2/7) in the control ( $p_{Dif} > 0$ ;  
224 0.796) (Bayesian analysis). Importantly, any patient had progression in the CIGB-325  
225 group and 28.6% (2/7) in the control group did it. Representative images of chest-CT  
226 evolution from one CIGB-325 treated patient are shown in Figure 1.

227 High levels of different serum markers like Creatinine Phospho Kinase (CPK), Reactive  
228 C-Protein (RCP), and Lactate dehydrogenase (LDH) have been associated to the adverse  
229 clinical outcome in Covid-19 patients. Therefore, we also explored the effect of CIGB-  
230 325 over these markers as secondary measure of efficacy. Of note, data from Figure 2  
231 shows that CIGB-325 treatment significantly reduced the CPK ( $p = 0.007$ ) and LDH ( $p =$   
232  $0.028$ ) serum levels. Also, the RCP values were lowered by CIGB-325 although with no  
233 statistical difference.

#### 234 **Safety**

235 Data from safety analysis indicated that intravenous CIGB-325 added to standard-*of-care*  
236 did increase both frequency of adverse events and patients with adverse events (Table 5).  
237 Particularly, pruritus, flushing and rash were increased by CIGB-325 treatment in the  
238 100, 80 and 60 % of patients respectively. As previously observed during CIGB-325  
239 intravenous administration, intensity of this kind of adverse events was mild and/or  
240 moderate in all of the patients.

241 **Discussion**

242 Protein Kinase CK2 has been recently suggested as a relevant target to combat SARS-  
243 Cov2 infection because of its role on the viral particles egress once accumulated in  
244 filopodial protrusions possessing budding viral particles [29]. Although anti-SARS-Cov2  
245 activity has been demonstrated through *in vitro* models by inhibiting protein kinase CK2,  
246 consistent and compelling evidence for effective anti-CK2 drugs from clinical studies is  
247 not available at this.

248 CIGB-325 is an anti-CK2 synthetic peptide extensively assessed in cancer patients whose  
249 safety, tolerability and efficacy signs have been gathered from Phase I-II trials. This  
250 clinical trial investigated the short-term outcomes of intravenous CIGB-325 at 2.5 mg/kg  
251 in a consecutive-5 day regimen which was added to standard care used in Covid-19  
252 disease in Cuba. Preliminary results suggest a quick clinical benefit with CIGB-325  
253 treatment particularly evidenced by the chest-CT data at day 7 post-treatment initiation.  
254 Despite the limited sample size and the imbalance of the baseline patient's characteristics  
255 unfavorable for the CIGB-325 group, our trial found that this treatment regimen had  
256 clinical benefit for Covid-19 patients with lower respiratory tract involvement.  
257 Specifically, CIGB-325 treatment fostered reduction of both, the number pulmonary  
258 lesions, and lesion's extent at day 7. Likewise, proportion of patients exhibiting this  
259 inhibitory effect is superior in the CIGB-325 group compared with standard care. When  
260 overall chest-CT response was analyzed by gathering number of lesions, lesion's extent  
261 and the pattern of Covid-19 typical abnormalities, 50% of patients in the CIGB-325  
262 group had favorable outcome compared with 20% in the standard care. The odds of  
263 difference for the CIGB-325 treatment respect standard care were  $> 0.90$  in all the chest-  
264 CT data by using a Bayesian model.

265 Considering some specific Covid-19 pulmonary lesions haven been associated to direct  
266 SARS-Cov2 infection of pneumocytes [34] along with the instrumental role of CK2  
267 during such infection [29], it might be reasonable to think that reduction of lesions can be  
268 achieved by an antiviral activity of CIGB-325 *onsite*. In fact, previous preclinical data of  
269 CIGB-325 pharmacokinetics and distribution in mice have demonstrated that up to 7.5  
270 mg/kg of peptide lung uptake is achieved after intravenous delivery [35].

271 This quick improvement of chest-CT response encouraged by addition of CIGB-325 to  
272 standard care could have a great clinical impact in avoiding progression to severity of  
273 Covid-19 patients. Additionally, our study shows that standard care based on alpha 2b  
274 IFN + kaletra/hydroxychloroquine also reduces pulmonary lesions at day 7 although to a  
275 lesser extent. Such effect rather might be by the previously reported anti-SARS-Cov2  
276 activity of type I IFNs when administered either by parenteral route or inhaled [36].  
277 While the clinical status (in particular SpO2 levels) and concurrent comorbidities of  
278 COVID-19 patients largely determine the need for their admittance to Intensive Care  
279 Units, several laboratory parameters may facilitate the assessment of disease severity and  
280 rational triaging. Among the markers that may be used in risk stratification to predict  
281 severe and fatal COVID-19 in hospitalized patients are the high serum levels of CPK  
282 [37], CRP [38] and LDH [39]. We found that CIGB-325 treatment decreased  
283 significantly the CPK levels compared with standard care which can suggest an early  
284 protective effect from tissue damage. High serum CPK levels have been associated to  
285 rhabdomyolysis, weakness and heart injury in Covid-19 patients; therefore, these findings  
286 also support the clinical benefit of using CIGB-325 in this viral disease. Accordingly,  
287 LDH and CRP serum levels which are considered inflammatory markers were also  
288 reduced after CIGB-325 treatment although no significantly.

289 Improvement of the clinical status at day 7 also trended to be superior by adding CIGB-  
290 325 to the standard care where 50% (4/8) patients experienced change towards a more  
291 favorable clinical category. Otherwise, standard care alone improved clinical status in  
292 25% (1/4). However, as this analysis takes into account only symptomatic patients in  
293 both groups, confirmation of the CIGB-325 effect in larger size population must be of  
294 major priority in future studies of this anti-CK2 peptide in Covid-19.

295 The dynamic conversion from positive to negative of SARS-Cov2 RT-PCR at the  
296 nasopharyngeal swabs was very similar for both groups of treatments over the time.  
297 Addition of CIGB-325 to the standard care did not shorten the time to viral clearance  
298 respect to the standard care at least in the regimen tested in our clinical trial. Other  
299 protocols with higher frequency of CIGB-325 administration merit to be explored for that  
300 purpose in future trials. Nonetheless, the usefulness and feasibility of the viral end point

301 in nasopharyngeal swabs to assess anti-SARS-Cov2 drugs has not been established yet.  
302 Instead, clinical endpoints seem to be more informative in the Covid-19 disease [11, 15].  
303 The safety profile of CIGB-325 plus standard care was very similar to that observed for  
304 CIGB-325 alone in which a predominant pattern of transient histaminergic-like side  
305 effects has been observed [30]. However, intensity of the side effects was mild and/or  
306 moderate in all the patients and total resolution of them was achieved in no more than one  
307 hour after CIGB-325 administration. Thus, our study confirms that combination of  
308 intravenous CIGB-325 at 2.5 mg/kg with standard care for Covid-19 is a manageable and  
309 safe strategy to treat patients with this infectious disease.  
310 All in all, our study gave important clues suggesting a potential quick clinical benefit at  
311 day 7 by using our anti-CK2 approach which has not been reported so far in Covid-19.  
312 Recently, a clinical trial with RDV has reported clinical benefit in terms of the number of  
313 days to recovery of the hospitalized Covid-19 patients with lower respiratory tract  
314 involvement in 11 days (95% confidence interval [CI], 9 to 12), [15], however evidences  
315 of chest-CT improvement at day 7 were not provided.  
316 Finally, integration of our data leads to the speculation that CIGB-325 might prevent  
317 COVID-19 getting worse by inducing an antiviral effect in the lungs and preventing  
318 damage caused by the virus. This notion merits further verification in future larger  
319 clinical trials of CIGB-325 in Covid-19 patients.

## 320 **Limitations**

321 In this exploratory study with a small sample size, randomization allowed a balance  
322 between the groups regarding the allocation of treatments but not regarding the  
323 prognostic variables.

324 **Conclusions**

325 Combination of CIGB-325 anti-CK2 peptide with standard-*of*-care based on alpha 2b-  
326 IFN/kaletra/hydroxychloroquine was adequately tolerated and superior in improving a  
327 quick chest-CT response in Covid-19 patients. On the contrary, SARS-Cov2 dynamics in  
328 nasopharyngeal swabs was similar for both groups over the time. Our clinical findings  
329 support future studies to continue to improve patient outcomes in Covid-19 by optimizing  
330 CIGB-325 regimens and combining with other antiviral agents. This is the first clinical  
331 study using an anti-CK2 approach in Covid-19 and our findings suggest that CK2  
332 inhibition can be an antiviral strategy with favorable risk-benefit to fight SARS-Cov2  
333 infection.

334 **Statements**

335 **Acknowledgements**

336 We thank Rosa Martinez, Manuel Puerto, Daimays González, Yahima de la O Tamayo, Danelis  
337 Pérez- Malo, Estela A Deyvis, Yuilyns Morales, Caridad Aguirre, and Yuliet Sinclair for their  
338 logistic support at the Luis Diaz Soto Hospital. Also, we thank Elizeth García, José Luis  
339 Rodriguez, Grettel Melo, Reinier Hernandez, Marel Alonso, Julio E Baldomero, and Francisco  
340 Hernandez from Clinical Department at the CIGB for their great contribution in the clinical trial  
341 execution.

342 **Conflict of Interest**

343 The authors declare no conflict of interest.

344 **Appendix**

345 ♣ATENEA-Co-300 group: Idelsis Esquivel, Maura García, Sara M Martínez, Ana G Galarraga,  
346 Kenia Gómez, Sidalyn Gutiérrez, Maria E Fuerte, Jane Fernandez, Yose Gamallo, Yanelis  
347 Alvarez, Yarelis Amador, Reynier Perez, Lisset Perurena, Daylen Aguilar

348 **References:**

- 349 1. [https://www.who.int/docs/default-source/coronaviruse/situation-reports/20200809-covid-19-](https://www.who.int/docs/default-source/coronaviruse/situation-reports/20200809-covid-19-sitrep-202)  
350 [sitrep-202.](https://www.who.int/docs/default-source/coronaviruse/situation-reports/20200809-covid-19-sitrep-202)
- 351 2. [https://coronavirus.jhu.edu/map.html.](https://coronavirus.jhu.edu/map.html)
- 352 3. Cohen, P. A.; Hall, L.; John, J. N.; Rapoport, A. B. In *The early natural history of SARS-CoV-2*  
353 *infection: Clinical observations from an urban, ambulatory COVID-19 clinic*, Mayo Clinic  
354 Proceedings, 2020; Elsevier: 2020; pp 1124-1126.
- 355 4. Wu, Z.; McGoogan, J., Outbreak in China: Summary of a Report of 72314 Cases from the Chinese  
356 Center for Disease Control and Prevention. *JAMA* **2020**, 10.
- 357 5. Wu, J.; Mafham, M.; Mamas, M.; Rashid, M.; Kontopantelis, E.; Deanfield, J.; de Belder, M.;  
358 Gale, C. P., Place and underlying cause of death during the COVID19 pandemic: retrospective  
359 cohort study of 3.5 million deaths in England and Wales, 2014 to 2020. *medRxiv* **2020**.
- 360 6. Phillips, R. O.; Robert, J.; Abass, K. M.; Thompson, W.; Sarfo, F. S.; Wilson, T.; Sarpong, G.;  
361 Gateau, T.; Chauty, A.; Omollo, R., Rifampicin and clarithromycin (extended release) versus  
362 rifampicin and streptomycin for limited Buruli ulcer lesions: a randomised, open-label, non-  
363 inferiority phase 3 trial. *The Lancet* **2020**.
- 364 7. Pushpakom, S.; Iorio, F.; Eyers, P. A.; Escott, K. J.; Hopper, S.; Wells, A.; Doig, A.; Guilliams,  
365 T.; Latimer, J.; McNamee, C., Drug repurposing: progress, challenges and recommendations.  
366 *Nature reviews Drug discovery* **2019**, 18, (1), 41-58.
- 367 8. Ohashi, H.; Watashi, K.; Saso, W.; Shionoya, K.; Iwanami, S.; Hirokawa, T.; Shirai, T.; Kanaya,  
368 S.; Ito, Y.; Kim, K. S., Multidrug treatment with nelfinavir and cepharanthine against COVID-19.  
369 *bioRxiv* **2020**.
- 370 9. Bao, L.; Deng, W.; Gao, H.; Xiao, C.; Liu, J.; Xue, J.; Lv, Q.; Liu, J.; Yu, P.; Xu, Y., Lack of  
371 reinfection in rhesus macaques infected with SARS-CoV-2. *bioRxiv* **2020**.
- 372 10. Cao, B.; Wang, Y.; Wen, D.; Liu, W.; Wang, J.; Fan, G.; Ruan, L.; Song, B.; Cai, Y.; Wei, M., A  
373 trial of lopinavir–ritonavir in adults hospitalized with severe Covid-19. *New England Journal of*  
374 *Medicine* **2020**.
- 375 11. Wang, Y.; Zhang, D.; Du, G.; Du, R.; Zhao, J.; Jin, Y.; Fu, S.; Gao, L.; Cheng, Z.; Lu, Q.,  
376 Remdesivir in adults with severe COVID-19: a randomised, double-blind, placebo-controlled,  
377 multicentre trial. *The Lancet* **2020**.
- 378 12. Borba, M. G. S.; Val, F. F. A.; Sampaio, V. S.; Alexandre, M. A. A.; Melo, G. C.; Brito, M.;  
379 Mourão, M. P. G.; Brito-Sousa, J. D.; Baía-da-Silva, D.; Guerra, M. V. F., Effect of high vs low  
380 doses of chloroquine diphosphate as adjunctive therapy for patients hospitalized with severe acute  
381 respiratory syndrome coronavirus 2 (SARS-CoV-2) infection: a randomized clinical trial. *JAMA*  
382 *network open* **2020**, 3, (4), e208857-e208857.

- 383 13. Cai, Q.; Yang, M.; Liu, D.; Chen, J.; Shu, D.; Xia, J.; Liao, X.; Gu, Y.; Cai, Q.; Yang, Y.,  
384 Experimental treatment with favipiravir for COVID-19: an open-label control study. *Engineering*  
385 **2020**.
- 386 14. Bauchner, H.; Fontanarosa, P. B., Randomized clinical trials and COVID-19: managing  
387 expectations. *Jama* **2020**.
- 388 15. Beigel, J. H.; Tomashek, K. M.; Dodd, L. E.; Mehta, A. K.; Zingman, B. S.; Kalil, A. C.;  
389 Hohmann, E.; Chu, H. Y.; Luetkemeyer, A.; Kline, S., Remdesivir for the treatment of Covid-  
390 19—preliminary report. *New England Journal of Medicine* **2020**.
- 391 16. Ahidjo, B. A.; Loe, M.; Ng, Y. L.; Mok, C. K.; Chu, J. J. H., Current Perspective of Antiviral  
392 Strategies against COVID-19. *ACS Infectious Diseases* **2020**.
- 393 17. Perera, Y.; Ramos, Y.; Padrón, G.; Caballero, E.; Guirola, O.; Caligiuri, L. G.; Lorenzo, N.;  
394 Gottardo, F.; Farina, H. G.; Filhol, O., CIGB-300 anti-cancer peptide regulates the protein kinase  
395 CK2-dependent phosphoproteome. *Mol Cell Biochem* **2020**.
- 396 18. Chua, M. M.; Ortega, C. E.; Sheikh, A.; Lee, M.; Abdul-Rassoul, H.; Hartshorn, K. L.;  
397 Dominguez, I., CK2 in cancer: cellular and biochemical mechanisms and potential therapeutic  
398 target. *Pharmaceuticals* **2017**, 10, (1), 18.
- 399 19. Siddiqui-Jain, A.; Drygin, D.; Streiner, N.; Chua, P.; Pierre, F.; O'Brien, S. E.; Bliesath, J.; Omori,  
400 M.; Huser, N.; Ho, C., CX-4945, an orally bioavailable selective inhibitor of protein kinase CK2,  
401 inhibits prosurvival and angiogenic signaling and exhibits antitumor efficacy. *Cancer research*  
402 **2010**, 70, (24), 10288-10298.
- 403 20. Laudet, B.; Barette, C.; Dulery, V.; Renaudet, O.; Dumy, P.; Metz, A.; Prudent, R.; Deshiere, A.;  
404 Dideberg, O.; Filhol, O., Structure-based design of small peptide inhibitors of protein kinase CK2  
405 subunit interaction. *Biochemical Journal* **2007**, 408, (3), 363-373.
- 406 21. Tellinghuisen, T. L.; Foss, K. L.; Treadaway, J., Regulation of hepatitis C virion production via  
407 phosphorylation of the NS5A protein. *PLoS Pathog* **2008**, 4, (3), e1000032.
- 408 22. Gupta, A. K.; Das, T.; Banerjee, A. K., Casein kinase II is the P protein phosphorylating cellular  
409 kinase associated with the ribonucleoprotein complex of purified vesicular stomatitis virus.  
410 *Journal of general virology* **1995**, 76, (2), 365-372.
- 411 23. Meggio, F.; D'Agostino, D. M.; Ciminale, V.; Chieco-Bianchi, L.; Pinna, L. A., Phosphorylation  
412 of HIV-1 Rev protein: implication of protein kinase CK2 and pro-directed kinases. *Biochemical*  
413 *and biophysical research communications* **1996**, 226, (2), 547-554.
- 414 24. Firzlaff, J.; Galloway, D.; Eisenman, R.; Lüscher, B., The E7 protein of human papillomavirus  
415 type 16 is phosphorylated by casein kinase II. *The New biologist* **1989**, 1, (1), 44-53.
- 416 25. Smith, M. C.; Bayless, A. M.; Goddard, E. T.; Davido, D. J., CK2 inhibitors increase the  
417 sensitivity of HSV-1 to interferon- $\beta$ . *Antiviral research* **2011**, 91, (3), 259-266.
- 418 26. Trembley, J. H.; Wang, G.; Unger, G.; Slaton, J.; Ahmed, K., Protein kinase CK2 in health and  
419 disease. *Cellular and molecular life sciences* **2009**, 66, (11-12), 1858-1867.



- 420 27. Zheng, Y., A CK2-dependent mechanism for activation of the JAK-STAT signaling pathway:  
421 implications for cancer biology. *Journal of Interferon & Cytokine Research* **2011**, 31, (2), 265-  
422 267.
- 423 28. Di Maira, G.; Salvi, M.; Arrigoni, G.; Marin, O.; Sarno, S.; Brustolon, F.; Pinna, L.; Ruzzene, M.,  
424 Protein kinase CK2 phosphorylates and upregulates Akt/PKB. *Cell Death & Differentiation* **2005**,  
425 12, (6), 668-677.
- 426 29. Bouhaddou, M.; Memon, D.; Meyer, B.; White, K. M.; Rezelj, V. V.; Marrero, M. C.; Polacco, B.  
427 J.; Melnyk, J. E.; Ulferts, S.; Kaake, R. M., The global phosphorylation landscape of SARS-CoV-  
428 2 infection. *Cell* **2020**, 182, (3), 685-712. e19.
- 429 30. García-Diegues, R.; de la Torre-Santos, A., Phase I Study of CIGB-300 Administered  
430 Intravenously in Patients with Relapsed/Refractory Solid Tumors. *ARCHIVOS DE MEDICINA*  
431 **2018**, 1, (1), 4.
- 432 31. Fernández Águila, J. D.; García Vega, Y.; Ríos Jiménez, R. O.; López Sacerio, A.; Rodríguez  
433 Rodríguez, C. R.; Rodríguez Fraga, Y.; Valenzuela Silva, C., Safety of intravenous application of  
434 cigb-300 in patients with hematological malignancies. EHPMA study. *Revista Cubana de*  
435 *Hematología, Inmunología y Hemoterapia* **2016**, 32, (2), 236-248.
- 436 32. [https://ctep.cancer.gov/protocoldevelopment/electronic\\_applications/ctc.htm#ctc\\_40](https://ctep.cancer.gov/protocoldevelopment/electronic_applications/ctc.htm#ctc_40).
- 437 33. <https://www.who-umc.org/whodrug/whodrug-portfolio>.
- 438 34. Carsana, L.; Sonzogni, A.; Nasr, A.; Rossi, R. S.; Pellegrinelli, A.; Zerbi, P.; Rech, R.; Colombo,  
439 R.; Antinori, S.; Corbellino, M., Pulmonary post-mortem findings in a series of COVID-19 cases  
440 from northern Italy: a two-centre descriptive study. *The Lancet Infectious Diseases* **2020**.
- 441 35. Perera, Y.; Farina, H. G.; Hernández, I.; Mendoza, O.; Serrano, J. M.; Reyes, O.; Gómez, D. E.;  
442 Gómez, R. E.; Acevedo, B. E.; Alonso, D. F., Systemic administration of a peptide that impairs  
443 the protein kinase (CK2) phosphorylation reduces solid tumor growth in mice. *International*  
444 *journal of cancer* **2008**, 122, (1), 57-62.
- 445 36. Pereda, R.; Gonzalez, D.; Rivero, H. B.; Rivero, J. C.; del Rosario Lopez, L.; Mezquia, N.;  
446 Venegas, R.; Betancourt, J. R.; Dominguez, R. E., Therapeutic effectiveness of interferon alpha 2b  
447 treatment for COVID-19 patient recovery. *medRxiv* **2020**.
- 448 37. Chan, K. H.; Farouji, I.; Harnoud, A. A.; Slim, J., Weakness and elevated creatinine kinase as the  
449 initial presentation of coronavirus disease 2019 (COVID-19). *The American Journal of*  
450 *Emergency Medicine* **2020**.
- 451 38. Velavan, T. P.; Meyer, C. G., Mild versus severe COVID-19: laboratory markers. *International*  
452 *Journal of Infectious Diseases* **2020**.
- 453 39. Henry, B. M.; Aggarwal, G.; Wong, J.; Benoit, S.; Vikse, J.; Plebani, M.; Lippi, G., Lactate  
454 dehydrogenase levels predict coronavirus disease 2019 (COVID-19) severity and mortality: A  
455 pooled analysis. *The American Journal of Emergency Medicine* **2020**.
- 456

457 **Legends Figures**

458 **Figure 1: Chest-CT Evolution.**

459 Representative chest-CT images from one patient in the CIGB-325 group at day 0 and  
460 day 7.

461 **Figure 2: Serum levels of Covid-19 linked markers.**

462 Serum levels of CPK (A), RCP (B) and LDH (C). Group I: CIGB-325 + Standard-of-  
463 care. Group II: Standard-of-care.

**Figure 1: Chest-CT Evolution**

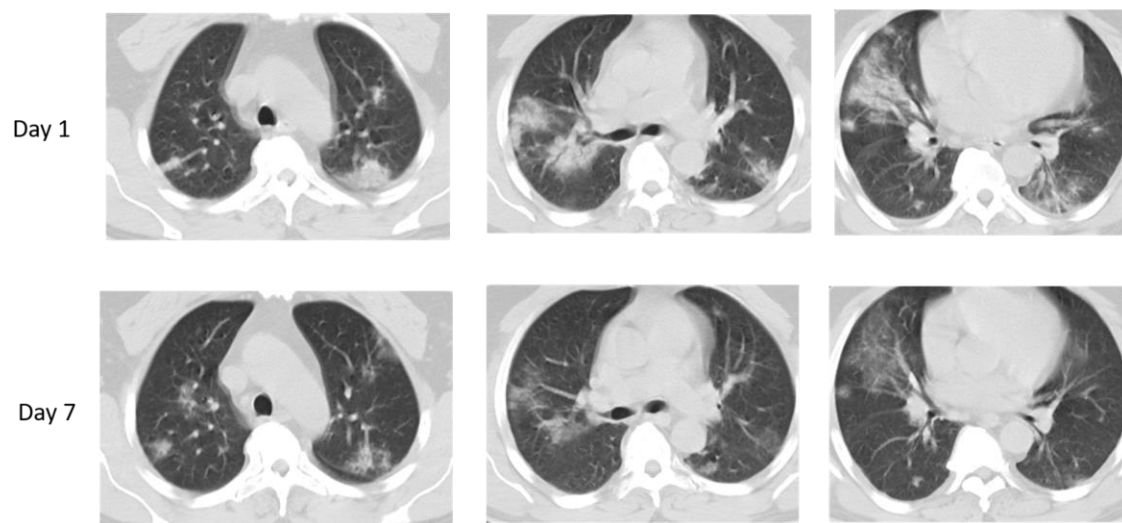

Figure 2: Serum levels of Covid-19 linked markers.

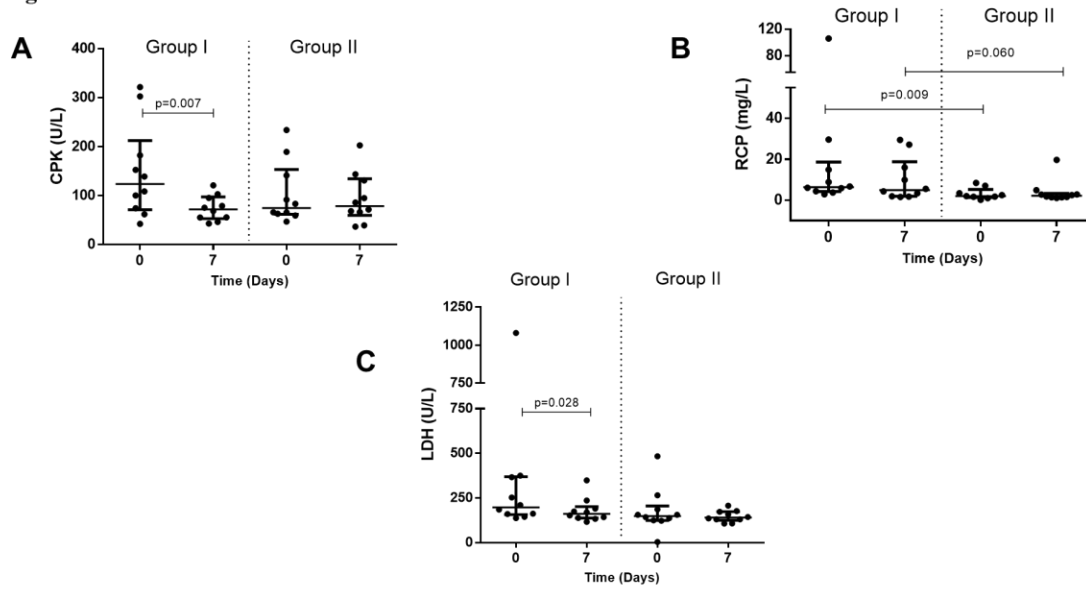

| <b>Table 1. Demographic and Clinical Characteristics at Baseline</b> |                       |                                                |                                 |
|----------------------------------------------------------------------|-----------------------|------------------------------------------------|---------------------------------|
| <b>Characteristic</b>                                                | <b>All<br/>(N=20)</b> | <b>CIGB-325 +<br/>Standard Care<br/>(N=10)</b> | <b>Standard Care<br/>(N=10)</b> |
| <b>Age (years)</b>                                                   | 45.35±12.0            | 51.6±11.4                                      | 39.1±12.6                       |
| <b>Sex No. (%)</b>                                                   |                       |                                                |                                 |
| Male                                                                 | 14 (70)               | 8 (80)                                         | 6 (60)                          |
| Female                                                               | 6 (30)                | 2 (20)                                         | 4 (40)                          |
| <b>Skin color No. (%)</b>                                            |                       |                                                |                                 |
| White                                                                | 12 (60)               | 5 (50)                                         | 7 (70)                          |
| Mestizo                                                              | 2 (20)                | 1 (10)                                         | 1 (10)                          |
| Black                                                                | 6 (20)                | 4 (40)                                         | 2 (20)                          |
| <b>Coexisting conditions<br/>No./Total No. (%)</b>                   |                       |                                                |                                 |
| Hypertension                                                         | 5 (25)                | 5 (50)                                         | 0 (0.0)                         |
| Obesity                                                              | 5 (25)                | 2 (20)                                         | 3 (30)                          |
| Type 2 Diabetes                                                      | 0 (0.0)               | 0 (0.0)                                        | 0 (0.0)                         |
| Cancer                                                               | 1 (5)                 | 1 (10)                                         | 0 (0.0)                         |
| Iron deficiency Anemia                                               | 1 (5)                 | 0 (0.0)                                        | 1 (10)                          |
| Hypothyroidism                                                       | 1 (5)                 | 0 (0.0)                                        | 1 (10)                          |
| Glaucoma                                                             | 1 (5)                 | 0 (0.0)                                        | 1 (10)                          |
| <b>Clinical status at<br/>enrollment</b>                             |                       |                                                |                                 |
| Asymptomatic                                                         | 14 (70)               | 6 (60)                                         | 8 (80)                          |
| Symptomatic                                                          | 6 (20)                | 4 (40)                                         | 2 (20)                          |
| <b>Clinical status at the<br/>starting day of<br/>treatment</b>      |                       |                                                |                                 |
| Asymptomatic                                                         | 9 (45)                | 3 (30)                                         | 6 (60)                          |
| Mild                                                                 | 0 (0.0)               | 0 (0.0)                                        | 0 (0.0)                         |
| Moderate                                                             | 9 (45)                | 5 (50)                                         | 4 (40)                          |
| Severe                                                               | 2 (10)                | 2 (20)                                         | 0 (0.0)                         |
| <b>Symptoms</b>                                                      |                       |                                                |                                 |
| Headache                                                             | 3 (15)                | 2 (20)                                         | 1 (10)                          |
| Anosmia                                                              | 1 (5)                 | 0 (0.0)                                        | 1 (10)                          |
| Loss of taste                                                        | 1 (5)                 | 0 (0.0)                                        | 1 (10)                          |
| Fever                                                                | 2 (10)                | 2 (20)                                         | 0 (0.0)                         |
| Dry cough                                                            | 2 (10)                | 1 (10)                                         | 1 (10)                          |
| Loss of appetite                                                     | 1 (5)                 | 1 (10)                                         | 0 (0.0)                         |
| Shortness of breath                                                  | 1 (5)                 | 0 (0.0)                                        | 1 (10)                          |
| Diarrhea                                                             | 1 (5)                 | 1 (10)                                         | 0 (0.0)                         |

| <b>Table 2: Chest-CT evolution considering number of pulmonary lesions</b> |               |             |                   |              |                        |
|----------------------------------------------------------------------------|---------------|-------------|-------------------|--------------|------------------------|
|                                                                            |               | Group       | I                 | II           | Sign. (U-Mann Whitney) |
|                                                                            |               | N*          | 6                 | 7            |                        |
| Number of lesions                                                          | Day 0         | Median ± RI | 9.5 ± 10.0        | 3.0 ± 5.0    | 0.051                  |
|                                                                            |               | (Min; Max)  | (0; 18)           | (0; 10)      |                        |
|                                                                            | Day 7         | Median ± RI | 5.5 ± 10.0        | 2.0 ± 5.0    | 0.149                  |
|                                                                            |               | (Min; Max)  | (0; 17)           | (0; 6)       |                        |
|                                                                            |               |             | Sign. (Wilcoxon)  | <b>0.042</b> | 0.680                  |
| Reduction of lesions                                                       | YES           |             | 5 (83.3%)         | 3 (42.9%)    | 0.266<br>(Fisher)      |
|                                                                            | NO            |             | 1 (16.7%)         | 4 (57.1%)    |                        |
|                                                                            | Dif. (IC 95%) |             | 41.4 (-6.9; 78.6) |              | Bayesian analysis      |
|                                                                            | P (Dif.>0)    |             | 0.951             |              |                        |

\* Per protocol population defined as patients who completed the originally allocated and patients that have TAC at the beginning and at the end of treatment.

| <b>Table 3: Chest-CT evolution considering lesion's extent</b> |               |                  |                  |           |                           |
|----------------------------------------------------------------|---------------|------------------|------------------|-----------|---------------------------|
|                                                                |               | Group            | I                | II        | Sign. (U-Mann<br>Whitney) |
|                                                                |               | N*               | 7                | 9         |                           |
| Lesion's extent<br>(Score 1-5)                                 | Day 0         | Median ± RI      | 4.5 ± 10.0       | 2.0 ± 5.0 | 0.146                     |
|                                                                |               | (Min; Max)       | (0; 18)          | (0; 6)    |                           |
|                                                                | Day 7         | Median ± RI      | 3.5 ± 10.0       | 2.0 ± 3.0 | 0.189                     |
|                                                                |               | (Min; Max)       | (0; 15)          | (0; 6)    |                           |
|                                                                |               | Sign. (Wilcoxon) | 0.066            | 1.000     |                           |
| Reduction of lesion's extent                                   | YES           |                  | 4 (66.7%)        | 1 (14.3%) | 0.103<br>(Fisher)         |
|                                                                | NO            |                  | 2 (33.0%)        | 6 (85.7%) |                           |
|                                                                | Dif. (IC 95%) |                  | 53.2 (3.6; 86.8) |           | Bayesian<br>analysis      |
|                                                                | P (Dif.>0)    |                  | 0.982            |           |                           |

\* Per protocol population defined as patients who completed the originally allocated and patients that have TAC at the beginning and at the end of treatment

| <b>Table 4: Overall chest-CT response</b> |  |                    |       |           |       |                      |
|-------------------------------------------|--|--------------------|-------|-----------|-------|----------------------|
| Group                                     |  | I                  |       | II        |       | Sig.<br>(Fisher)     |
| N                                         |  | Frequency          | %     | Frequency | %     |                      |
| Chest-CT response                         |  | 10                 | 100.0 | 10        | 100.0 | 0.592                |
| N*                                        |  | 6                  | 60.0  | 7         | 70.0  |                      |
| Responders                                |  | 3                  | 50.0  | 2         | 28.6  |                      |
| No progression                            |  | 1                  | 16.7  | 2         | 28.6  |                      |
| Stable                                    |  | 2                  | 33.3  | 1         | 14.3  |                      |
| Progression                               |  | 0                  | 0.0   | 2         | 28.6  | Bayesian<br>analysis |
| Dif. (IC 95%)                             |  | 21.0 (-28.6; 66.0) |       |           |       |                      |
| P (Dif.>0)                                |  | 0.796              |       |           |       |                      |

\* Per protocol population defined as patients who completed the originally allocated and patients that have TAC at the beginning and at the end of treatment.



| <b>Table 5: Adverse events</b> |                  |          |                  |          |                  |          |                  |          |
|--------------------------------|------------------|----------|------------------|----------|------------------|----------|------------------|----------|
|                                | <b>Group I</b>   |          |                  |          | <b>Group II</b>  |          |                  |          |
|                                | <b>Patients</b>  |          | <b>Events</b>    |          | <b>Patients</b>  |          | <b>Events</b>    |          |
|                                | <b>Frequency</b> | <b>%</b> | <b>Frequency</b> | <b>%</b> | <b>Frequency</b> | <b>%</b> | <b>Frequency</b> | <b>%</b> |
| N                              | 10               | 100      | 109              | 100      | 10               | 100      | 7                | 100      |
| Pruritus                       | 10               | 100.0    | 48               | 44.0     | --               | --       | --               | --       |
| Rash                           | 6                | 60.0     | 12               | 11.0     | --               | --       | --               | --       |
| Flush                          | 8                | 80.0     | 23               | 21.1     | --               | --       | --               | --       |
| Hot flashes                    | 5                | 50.0     | 12               | 11.0     | --               | --       | --               | --       |
| Wheals                         | 3                | 30.0     | 5                | 4.6      | --               | --       | --               | --       |
| Bradycardia                    | 1                | 10.0     | 1                | 0.9      | --               | --       | --               | --       |
| Cramps                         | 2                | 20.0     | 2                | 1.8      | 1                | 10.0     | 1                | 14.3     |
| Trembling                      | 2                | 20.0     | 2                | 1.8      | --               | --       | --               | --       |
| Chills                         | 1                | 10.0     | 1                | 0.9      | --               | --       | --               | --       |
| Nausea                         | 1                | 10.0     | 1                | 0.9      | 1                | 10.0     | 2                | 28.6     |
| Tinnitus                       | 1                | 10.0     | 2                | 1.8      | --               | --       | --               | --       |
| Diarrhea                       | --               | --       | --               | --       | 1                | 10.0     | 2                | 28.6     |
| Headache                       | --               | --       | --               | --       | 1                | 10.0     | 2                | 28.6     |

**Group I: CIGB-325 plus standard-of-care    Group II: Standard-of-care**
